# Supplementary material for: Long-Term Growth in Phenylketonuria: A Systematic Review and Meta-Analysis
Source: Nutrients. 2019 Sep 3;11(9):2070. doi: 10.3390/nu11092070 (PMC6769966; doi:10.3390/nu11092070)
Supplement: Supplementary file 1 [file nutrients-11-02070-s001.pdf]

**Supplementary Table S1.** Timing of diet initiation and description of intervention.

| Reference                            | Time of diet initiation      | Description of intervention                                                                                                                                                                                                                                                                                                                                                                                     |
|--------------------------------------|------------------------------|-----------------------------------------------------------------------------------------------------------------------------------------------------------------------------------------------------------------------------------------------------------------------------------------------------------------------------------------------------------------------------------------------------------------|
| Kennedy et al., 1967 [7]             | Within 12 to 20 days of life | All PKU infants were treated with a Phe-restricted diet, supplemented with a hydrolyzed casein preparation (Lofenalac). Solids were introduced at 10-12 months. No supplements were given. Sufficient supplementary low protein food was given to fulfil energy and protein requirements.                                                                                                                       |
| Hoeksma et al., 2005 [19]            | Within 21 days of life       | N/A                                                                                                                                                                                                                                                                                                                                                                                                             |
| Verkerk et al., 1994 [20]            | Within 2 to 3 weeks of life  | N/A                                                                                                                                                                                                                                                                                                                                                                                                             |
| Schaefer et al., 1994 [21]           | Within 4 to 48 days of life  | Reduction of Phe intake was accomplished by the use of various Phe-free protein substitutes (both bovine serum, casein hydrolysates and Phe-free amino acid mixtures). Diet was supplemented with cow's milk and low protein foods (cereals, fruits, vegetables, low protein products). All were included in the total protein intake.                                                                          |
| Dhondt et al., 1995 [23]             | During the neonatal period   | All PKU patients were treated with a Phe-restricted diet, supplemented with Lofenalac until 6 months of age, then Aminogram (patients born before 1983) or PKU 2. At 8 years of age, a relaxed diet progressively replaced the Phe-restricted diet ( <i>blood Phe were kept between 15 and 20 mg/dl</i> ).                                                                                                      |
| Aldámiz-Echevarría et al., 2014 [26] | Within weeks or days of life | All PKU patients were treated with Phe-restricted diet, supplemented with Phe-free amino acid mixtures and low-protein foods. Patients were allowed to consume unlimited amounts of fruits and vegetables after 1996.                                                                                                                                                                                           |
| Thiele et al., 2017 [27]             | During the neonatal period   | Patients born before 1980 consumed a casein hydrolysate (Berlophen) during childhood (at least in the first 10 years of life) and patients born after 1989 were exclusively receiving Phe-free protein substitute. In 27 patients (born between 1971 and 1981) diet was interrupted at a median age of 7 years (range 6-15 years), and of these, 19 restarted therapy before adulthood (median age of 14 years) |
| Belanger-Quintana et al., 2011 [31]  | N/A                          | All PKU patients were treated with a Phe-restricted diet, supplemented with Phe-free amino acid mixtures. Natural proteins in peeled potatoes, and all kind of fruits and vegetables were provided without restriction after 1994. Mild HPA patients followed a normal diet.                                                                                                                                    |
| Couce et al., 2015 [32]              | Within first month of life   | All PKU patients were treated with a Phe-restricted diet, supplemented with Phe-free amino acid mixtures. Dietary treatment was held according to the Spanish PKU guidelines. Mild HPA patients followed a normal diet.                                                                                                                                                                                         |

N/A: Not available; PKU: phenylketonuria; Phe: phenylalanine; HPA: hyperphenylalaninemia.

**Supplementary Table S1 (cont).** Timing of diet initiation and description of intervention.

| Reference                       | Time of diet initiation       | Description of intervention                                                                                                                                                                                                                                                                                                                                                                                             |
|---------------------------------|-------------------------------|-------------------------------------------------------------------------------------------------------------------------------------------------------------------------------------------------------------------------------------------------------------------------------------------------------------------------------------------------------------------------------------------------------------------------|
| Evans et al., 2017 [33]         | N/A                           | All PKU patients were treated with a Phe-restricted diet, supplemented with Phe-free amino acid mixtures. Fruits and vegetables were allowed freely.                                                                                                                                                                                                                                                                    |
| van der Schot et al., 1994 [39] | Within 9 to 21 days of life   | N/A                                                                                                                                                                                                                                                                                                                                                                                                                     |
| Chang et al., 1984 [40]         | Within first 2 months of life | N/A                                                                                                                                                                                                                                                                                                                                                                                                                     |
| Kindt et al., 1983 [41]         | Within 15 to 18 days of life  | The diet was based on Albumaid XP. Negligible amounts of protein from protein-free foods were excluded. The protein content of vegetables and fruits were included. Half of the patients were given a daily protein intake according to the recommendations of RDA (received about 60% more Albumaid XP than FAO), and half of the patients were followed a dietary protein intake based on the recommendations of FAO. |

N/A: Not available; PKU: phenylketonuria; Phe: phenylalanine; HPA: hyperphenylalaninemia; FAO: Food and Agriculture Organization; RDA: recommended dietary allowance.

**Supplementary Table S2.** Dietary intakes of the intervention group in the included studies.

| Reference                            | Dietary intakes                                                                                                                                     |                                                                                                                                                                   |                                                                                                                                                                   |                                                                                                                                                                   |
|--------------------------------------|-----------------------------------------------------------------------------------------------------------------------------------------------------|-------------------------------------------------------------------------------------------------------------------------------------------------------------------|-------------------------------------------------------------------------------------------------------------------------------------------------------------------|-------------------------------------------------------------------------------------------------------------------------------------------------------------------|
|                                      | Phenylalanine<br>(mg/kg/day)                                                                                                                        | Natural protein<br>(g/kg/day)                                                                                                                                     | Protein equivalent from substitutes<br>(g/kg/day)                                                                                                                 | Total protein<br>(g/kg/day)                                                                                                                                       |
| Kennedy et al., 1967 [7]             | (900 mg/day in milder types)                                                                                                                        | N/A                                                                                                                                                               | N/A                                                                                                                                                               | (In 3 of 11 atypical patients were taking normal diets up to 90 g protein daily)                                                                                  |
| Hoeksma et al., 2005 [19]            | N/A                                                                                                                                                 | <b>0-6 months:</b> 1.22±0.53<br><b>6-12 months:</b> 1.03±0.41<br><b>1-2 years:</b> 0.97±0.46<br><b>2-3 years:</b> 0.93±0.51<br><b>Mean (0-3 years):</b> 0.99±0.34 | <b>0-6 months:</b> 1.46±0.58<br><b>6-12 months:</b> 1.28±0.38<br><b>1-2 years:</b> 1.26±0.34<br><b>2-3 years:</b> 1.22±0.42<br><b>Mean (0-3 years):</b> 1.29±0.28 | <b>0-6 months:</b> 2.70±0.50<br><b>6-12 months:</b> 2.36±0.51<br><b>1-2 years:</b> 2.25±0.56<br><b>2-3 years:</b> 2.20±0.65<br><b>Mean (0-3 years):</b> 2.33±0.42 |
| Verkerk et al., 1994 [20]            | N/A                                                                                                                                                 | N/A                                                                                                                                                               | N/A                                                                                                                                                               | N/A                                                                                                                                                               |
| Schaefer et al., 1994 [21]           | <b>0-2 years:</b> 28.3±5.0<br><b>3-6 years:</b> 19.0±5.0                                                                                            | N/A                                                                                                                                                               | N/A                                                                                                                                                               | <b>0-2 years:</b> 2.24±0.5<br><b>3-6 years:</b> 1.98±0.25                                                                                                         |
| Dhondt et al., 1995 [23]             | N/A                                                                                                                                                 | N/A                                                                                                                                                               | N/A                                                                                                                                                               | N/A                                                                                                                                                               |
| Aldámiz-Echevarría et al., 2014 [26] | <b>0-2 years:</b> 28.2 [20.8-36.2]<br><b>2-9 years:</b> 15.5 [10.9-20.4]<br><b>9-12 years:</b> 8.6 [7.0-11.3]<br><b>12-18 years:</b> 7.6 [5.4-10.3] | <b>0-2 years:</b> 0.8 [0.5-1.0]<br><b>2-9 years:</b> 0.5 [0.3-0.9]<br><b>9-12 years:</b> 0.3 [0.2-0.5]<br><b>12-18 years:</b> 0.3 [0.2-0.5]                       | <b>0-2 years:</b> 1.4 [1.0-1.7]<br><b>2-9 years:</b> 1.3 [1.0-1.7]<br><b>9-12 years:</b> 1.2 [0.9-1.4]<br><b>12-18 years:</b> 1.0 [0.7-1.3]                       | <b>0-2 years:</b> 2.2 [1.8-2.8]<br><b>2-9 years:</b> 1.8 [1.4-2.3]<br><b>9-12 years:</b> 1.2 [1.0-1.7]<br><b>12-18 years:</b> 1.1 [1.0-1.4]                       |
| Thiele et al., 2017 [27]             | N/A                                                                                                                                                 | <b>0-1 year:</b> 0.7<br><b>2-10 years:</b> 0.2-0.5<br><b>&gt;10 years:</b> 0.2                                                                                    | <b>0-1 year:</b> 1.6<br><b>2-10 years:</b> 1.0-1.6<br><b>&gt;10 years:</b> 0.8-1.0                                                                                | <b>0-1 year:</b> 2.3<br><b>2-10 years:</b> 1.2-2.1<br><b>&gt;10 years:</b> 1.0-1.2                                                                                |

N/A: Not available.

**Supplementary Table S2 (cont).** Dietary intakes of the intervention group in the included studies.

| Reference                              | Dietary intakes              |                                                                                     |                                                                                                                                     |                                                                                                                                                 |
|----------------------------------------|------------------------------|-------------------------------------------------------------------------------------|-------------------------------------------------------------------------------------------------------------------------------------|-------------------------------------------------------------------------------------------------------------------------------------------------|
|                                        | Phenylalanine<br>(mg/kg/day) | Natural protein<br>(g/kg/day)                                                       | Protein equivalent from substitutes<br>(g/kg/day)                                                                                   | Total protein<br>(g/kg/day)                                                                                                                     |
| Belanger-Quintana et al., 2011<br>[31] | N/A                          | <u>Mild PKU:</u><br><b>0-2 years:</b> 15-25 g/day<br><b>2-18 years:</b> 15-40 g/day | <u>Mild-PKU:</u><br><b>0-2 years:</b> 2.5 - 3.0<br><b>2-9 years:</b> 2.0 - 2.5<br><b>9-12 years:</b> 1.5<br><b>12-18 years:</b> 1.0 | <u>Mild-PKU:</u><br><b>0-2 years:</b> 4.0 - 6.0<br><b>2-9 years:</b> 4.0 - 5.0<br><b>9-12 years:</b> 3.0 - 4.0<br><b>12-18 years:</b> 3.0 - 4.0 |
|                                        |                              | <u>Moderate PKU:</u><br><b>0-18 years:</b> 6-15 g/day                               | <u>Moderate &amp; Classic PKU:</u><br><b>0-2 years:</b> 3.0<br><b>2-9 years:</b> 2.5                                                | <u>Moderate &amp; Classic PKU:</u><br><b>0-2 years:</b> 3.0 - 5.0<br><b>2-9 years:</b> 3.0 - 4.0                                                |
|                                        |                              | <u>Classic PKU:</u><br><b>0-18 years:</b> 0-6 g/day                                 | <b>9-12 years:</b> 2.0<br><b>12-18 years:</b> 1.5                                                                                   | <b>9-12 years:</b> 3.0 - 4.0<br><b>12-18 years:</b> 2.0 - 3.0                                                                                   |
|                                        |                              |                                                                                     |                                                                                                                                     |                                                                                                                                                 |
| Couce et al., 2015 [32]                | N/A                          | N/A                                                                                 | N/A                                                                                                                                 | (The average protein intake was 1.3–1.5 times above the RDA)                                                                                    |
| Evans et al., 2017 [33]                | N/A                          | 0.5±0.18 (0.18 - 0.80)                                                              | 1.54±0.50 (0.80 - 2.70)                                                                                                             | 2.05±0.60 (1.00-3.5)                                                                                                                            |
| van der Schot et al., 1994 [39]        | N/A                          | N/A                                                                                 | N/A                                                                                                                                 | N/A                                                                                                                                             |
| Chang et al., 1984 [40]                | N/A                          | N/A                                                                                 | N/A                                                                                                                                 | N/A                                                                                                                                             |
| Kindt et al., 1983 [41]                | N/A                          | N/A                                                                                 | N/A                                                                                                                                 | <u>0-12 months:</u><br><b>RDA-group:</b> 2.4<br><b>FAO-group:</b> 1.79                                                                          |
|                                        |                              |                                                                                     |                                                                                                                                     | <u>12-24 months:</u><br><b>RDA-group:</b> 1.95<br><b>FAO-group:</b> 1.33                                                                        |

N/A: Not available; PKU: phenylketonuria; FAO: Food and Agriculture Organization; RDA: recommended dietary allowance.

**Supplementary Table S3.** Metabolic control of patients and data regarding parental growth.

| Reference                            | Metabolic control                                                                                                                                                                                                                                                                                                                                                                                                                                                                                                                                                                                                                                                                                                                                                                    | Parental growth                                                                                                                                                                                                                                                        |
|--------------------------------------|--------------------------------------------------------------------------------------------------------------------------------------------------------------------------------------------------------------------------------------------------------------------------------------------------------------------------------------------------------------------------------------------------------------------------------------------------------------------------------------------------------------------------------------------------------------------------------------------------------------------------------------------------------------------------------------------------------------------------------------------------------------------------------------|------------------------------------------------------------------------------------------------------------------------------------------------------------------------------------------------------------------------------------------------------------------------|
| Kennedy et al., 1967 [7]             | <i>Mean serum Phe levels in Classic PKU (mg/dl):</i><br><b>6 months (n=20):</b> 6.3 (range: 0.9-19.9)<br><b>12 months (n=20):</b> 6.4 (range: 0.5-20.3)<br><b>24 months (n=13):</b> 10.1 (range: 20)                                                                                                                                                                                                                                                                                                                                                                                                                                                                                                                                                                                 | N/A                                                                                                                                                                                                                                                                    |
| Hoeksma et al., 2005 [19]            | N/A                                                                                                                                                                                                                                                                                                                                                                                                                                                                                                                                                                                                                                                                                                                                                                                  | N/A                                                                                                                                                                                                                                                                    |
| Verkerk et al., 1994 [20]            | N/A                                                                                                                                                                                                                                                                                                                                                                                                                                                                                                                                                                                                                                                                                                                                                                                  | N/A                                                                                                                                                                                                                                                                    |
| Schaefer et al., 1994 [21]           | <i>Dietary management was aimed to keep plasma Phe concentrations between 120 to 360 <math>\mu</math>mol/L. Mean plasma Phe levels were 315<math>\pm</math>103 <math>\mu</math>mol/L during the first 2 years of life, and 418<math>\pm</math>151 <math>\mu</math>mol/L during the third to sixth year.</i>                                                                                                                                                                                                                                                                                                                                                                                                                                                                          | N/A                                                                                                                                                                                                                                                                    |
| Dhondt et al., 1995 [23]             | <i>Before 8 years, blood Phe levels were kept below 8 mg/dl. Diet was relaxed after 8 years with a target blood Phe level of 15-20 mg/dl.</i>                                                                                                                                                                                                                                                                                                                                                                                                                                                                                                                                                                                                                                        | N/A                                                                                                                                                                                                                                                                    |
| Aldámiz-Echevarría et al., 2014 [26] | <i>Target blood Phe levels were established according to the Spanish protocol (0-6 years: &lt;360 <math>\mu</math>mol/L, 6-10 years: &lt;480 <math>\mu</math>mol/L, and &gt;10 years: &lt;600 <math>\mu</math>mol/L). Mean blood Phe was significantly higher in the PKU group for both males and females (<math>p&gt;0.05</math>).</i>                                                                                                                                                                                                                                                                                                                                                                                                                                              | N/A                                                                                                                                                                                                                                                                    |
| Thiele et al., 2017 [27]             | <i>Mean plasma Phe levels (<math>\mu</math>mol/L):</i><br><b>1 year (n=103):</b> 301 $\pm$ 153 <b>10 years (n=76):</b> 361 $\pm$ 197<br><b>2 years (n=101):</b> 290 $\pm$ 151 <b>11 years (n=76):</b> 367 $\pm$ 174<br><b>3 years (n=99):</b> 307 $\pm$ 170 <b>12 years (n=76):</b> 423 $\pm$ 89<br><b>4 years (n=98):</b> 320 $\pm$ 168 <b>13 years (n=76):</b> 456 $\pm$ 224<br><b>5 years (n=92):</b> 341 $\pm$ 189 <b>14 years (n=76):</b> 468 $\pm$ 226<br><b>6 years (n=89):</b> 332 $\pm$ 197 <b>15 years (n=76):</b> 506 $\pm$ 256<br><b>7 years (n=86):</b> 335 $\pm$ 191 <b>16 years (n=76):</b> 541 $\pm$ 503<br><b>8 years (n=76):</b> 331 $\pm$ 170 <b>17 years (n=76):</b> 579 $\pm$ 275<br><b>9 years (n=76):</b> 333 $\pm$ 165 <b>18 years (n=76):</b> 637 $\pm$ 270 | <i>Parents of PKU has shown no sign of reduced final height (Patients' fathers: 179.4 <math>\pm</math> 7.9 cm, healthy German men: 174.8 <math>\pm</math> 8.1; patients' mothers: 166.0 <math>\pm</math> 6.2 cm, healthy German women: 166.4 <math>\pm</math> 4.1)</i> |

N/A: Not available; Phe: phenylalanine; PKU: phenylketonuria.

**Supplementary Table S3 (cont).** Metabolic control of patients and data regarding parental growth.

| Reference                           | Metabolic control                                                                                                                                                                                                                                                                                                                                                                                                                                                                                                                                                                                                                                                                                                                                           | Parental growth                                                                                                                                                                                    |
|-------------------------------------|-------------------------------------------------------------------------------------------------------------------------------------------------------------------------------------------------------------------------------------------------------------------------------------------------------------------------------------------------------------------------------------------------------------------------------------------------------------------------------------------------------------------------------------------------------------------------------------------------------------------------------------------------------------------------------------------------------------------------------------------------------------|----------------------------------------------------------------------------------------------------------------------------------------------------------------------------------------------------|
| Belanger-Quintana et al., 2011 [31] | N/A<br>(Metabolic control and compliance were good in the great majority of cases until the last years of adolescence.)                                                                                                                                                                                                                                                                                                                                                                                                                                                                                                                                                                                                                                     | PKU patients (N=32, who reached to their final height) were grown between 2 and 4 cm more than their expected mean family height (p<0.001) (within the CI of the mean family height of $\pm 5$ cm) |
| Couce et al., 2015 [32]             | Target Phe levels (0-6 years: <360 $\mu\text{mol/L}$ , 6-10 years: <480 $\mu\text{mol/L}$ , and >10 years: <600 $\mu\text{mol/L}$ ) were maintained.<br><6 years ( $\mu\text{mol/L}$ ):<br><b>Male (PKU):</b> 287.9 $\pm$ 50.8; <b>Female (PKU):</b> 301.5 $\pm$ 26.7<br><b>Male (mHPA):</b> 240.7 $\pm$ 51.2; <b>Female (mHPA):</b> 250.1 $\pm$ 43.8<br>6-10 years ( $\mu\text{mol/L}$ ):<br><b>Male (PKU):</b> 367.2 $\pm$ 67.1; <b>Female (PKU):</b> 363.5 $\pm$ 57.1<br><b>Male (mHPA):</b> 270.7 $\pm$ 56.7; <b>Female (mHPA):</b> 275.6 $\pm$ 37.8<br>>10 years ( $\mu\text{mol/L}$ ):<br><b>Male (PKU):</b> 481.8 $\pm$ 106.9; <b>Female (PKU):</b> 444.3 $\pm$ 80.7<br><b>Male (mHPA):</b> 284.0 $\pm$ 54.6; <b>Female (mHPA):</b> 310.2 $\pm$ 21.4 | N/A                                                                                                                                                                                                |
| Evans et al., 2017 [33]             | N/A                                                                                                                                                                                                                                                                                                                                                                                                                                                                                                                                                                                                                                                                                                                                                         | N/A                                                                                                                                                                                                |
| van der Schot et al., 1994 [39]     | Mean plasma Phe levels were 0.35 mmol/l (5.8 mg/dl) at first year, and 0.39 mmol/l (6.5 mg/dl) at second year of life.                                                                                                                                                                                                                                                                                                                                                                                                                                                                                                                                                                                                                                      | N/A                                                                                                                                                                                                |
| Chang et al., 1984 [40]             | N/A                                                                                                                                                                                                                                                                                                                                                                                                                                                                                                                                                                                                                                                                                                                                                         | N/A                                                                                                                                                                                                |
| Kindt et al., 1983 [41]             | Metabolic control was equally well in both RDA and FAO groups according to plasma Phe levels.<br>Mean plasma Phe levels (0-12 months):<br>RDA group: 303-752 $\mu\text{mol/L}$ , FAO group: 376-673 $\mu\text{mol/L}$ ;<br>Mean plasma Phe levels (12-24 months):<br>RDA group: 272-642 $\mu\text{mol/L}$ , FAO group: 436-545 $\mu\text{mol/L}$                                                                                                                                                                                                                                                                                                                                                                                                            | N/A                                                                                                                                                                                                |

N/A: Not available; CI: confidence interval; Phe: phenylalanine; PKU: phenylketonuria; mHPA: mild hyperphenylalaninemia; FAO: Food and Agriculture Organization; RDA: recommended dietary allowance.
